# Supplementary material for: Plant Fructokinases: Evolutionary, Developmental, and Metabolic Aspects in Sink Tissues
Source: Front Plant Sci. 2018 Mar 16;9:339. doi: 10.3389/fpls.2018.00339 (PMC5864856; doi:10.3389/fpls.2018.00339)
Supplement: Supplementary file 1 [file Data_Sheet_1.XLSX]

## Sheet: Sheet1
Sequence Identity Matrix
Input Alignment File: C:\Users\oferst\Desktop\plant FRKs 2.fas
Seq->	At1g06020	At1g06030	At1g66430	At2g31390	At3g59480	At4g10260	At5g51830	SlFRK3	SlFRK1	SlFRK2	SlFRK4	Os01g0894300	Os08g0113100	Zm00001d035037	Zm00001d042536	BvFRK	StFRK	AtFLN1	SlFLN1	ZmFLN1	AtFLN2	SlFLN2	ZmFLN2
At1g06020	ID	0.878	0.493	0.814	0.785	0.626	0.552	0.517	0.523	0.766	0.529	0.663	0.61	0.593	0.686	0.75	0.744	0.243	0.225	0.213	0.155	0.152	0.163
At1g06030	0.878	ID	0.528	0.869	0.817	0.644	0.594	0.55	0.554	0.806	0.557	0.696	0.64	0.632	0.717	0.803	0.782	0.247	0.235	0.216	0.158	0.156	0.163
At1g66430	0.493	0.528	ID	0.526	0.528	0.546	0.605	0.76	0.589	0.52	0.619	0.531	0.531	0.539	0.523	0.533	0.515	0.257	0.25	0.218	0.167	0.179	0.161
At2g31390	0.814	0.869	0.526	ID	0.858	0.655	0.609	0.539	0.575	0.823	0.554	0.707	0.642	0.62	0.732	0.797	0.796	0.241	0.235	0.22	0.165	0.16	0.166
At3g59480	0.785	0.817	0.528	0.858	ID	0.664	0.6	0.539	0.568	0.826	0.565	0.687	0.649	0.636	0.699	0.803	0.812	0.264	0.248	0.227	0.162	0.159	0.161
At4g10260	0.626	0.644	0.546	0.655	0.664	ID	0.618	0.55	0.577	0.675	0.576	0.618	0.715	0.706	0.623	0.667	0.643	0.252	0.231	0.206	0.152	0.162	0.143
At5g51830	0.552	0.594	0.605	0.609	0.6	0.618	ID	0.607	0.698	0.6	0.663	0.609	0.597	0.594	0.606	0.597	0.586	0.252	0.23	0.203	0.169	0.164	0.15
SlFRK3	0.517	0.55	0.76	0.539	0.539	0.55	0.607	ID	0.584	0.529	0.628	0.532	0.532	0.539	0.532	0.542	0.521	0.244	0.235	0.212	0.162	0.173	0.155
SlFRK1	0.523	0.554	0.589	0.575	0.568	0.577	0.698	0.584	ID	0.555	0.628	0.593	0.575	0.57	0.589	0.56	0.553	0.234	0.223	0.206	0.167	0.167	0.149
SlFRK2	0.766	0.806	0.52	0.823	0.826	0.675	0.6	0.529	0.555	ID	0.562	0.692	0.657	0.647	0.704	0.797	0.917	0.252	0.242	0.231	0.162	0.156	0.158
SlFRK4	0.529	0.557	0.619	0.554	0.565	0.576	0.663	0.628	0.628	0.562	ID	0.573	0.57	0.578	0.565	0.578	0.549	0.25	0.246	0.223	0.155	0.161	0.158
Os01g0894300	0.663	0.696	0.531	0.707	0.687	0.618	0.609	0.532	0.593	0.692	0.573	ID	0.61	0.614	0.929	0.685	0.674	0.247	0.244	0.22	0.159	0.159	0.163
Os08g0113100	0.61	0.64	0.531	0.642	0.649	0.715	0.597	0.532	0.575	0.657	0.57	0.61	ID	0.904	0.622	0.673	0.645	0.254	0.231	0.204	0.146	0.143	0.137
Zm00001d035037	0.593	0.632	0.539	0.62	0.636	0.706	0.594	0.539	0.57	0.647	0.578	0.614	0.904	ID	0.62	0.655	0.629	0.252	0.227	0.201	0.142	0.137	0.134
Zm00001d042536	0.686	0.717	0.523	0.732	0.699	0.623	0.606	0.532	0.589	0.704	0.565	0.929	0.622	0.62	ID	0.712	0.686	0.241	0.233	0.216	0.154	0.156	0.155
BvFRK	0.75	0.803	0.533	0.797	0.803	0.667	0.597	0.542	0.56	0.797	0.578	0.685	0.673	0.655	0.712	ID	0.785	0.252	0.244	0.217	0.157	0.156	0.155
StFRK	0.744	0.782	0.515	0.796	0.812	0.643	0.586	0.521	0.553	0.917	0.549	0.674	0.645	0.629	0.686	0.785	ID	0.254	0.24	0.225	0.152	0.151	0.155
AtFLN1	0.243	0.247	0.257	0.241	0.264	0.252	0.252	0.244	0.234	0.252	0.25	0.247	0.254	0.252	0.241	0.252	0.254	ID	0.678	0.527	0.264	0.278	0.257
SlFLN1	0.225	0.235	0.25	0.235	0.248	0.231	0.23	0.235	0.223	0.242	0.246	0.244	0.231	0.227	0.233	0.244	0.24	0.678	ID	0.532	0.278	0.286	0.264
ZmFLN1	0.213	0.216	0.218	0.22	0.227	0.206	0.203	0.212	0.206	0.231	0.223	0.22	0.204	0.201	0.216	0.217	0.225	0.527	0.532	ID	0.282	0.292	0.269
AtFLN2	0.155	0.158	0.167	0.165	0.162	0.152	0.169	0.162	0.167	0.162	0.155	0.159	0.146	0.142	0.154	0.157	0.152	0.264	0.278	0.282	ID	0.485	0.373
SlFLN2	0.152	0.156	0.179	0.16	0.159	0.162	0.164	0.173	0.167	0.156	0.161	0.159	0.143	0.137	0.156	0.156	0.151	0.278	0.286	0.292	0.485	ID	0.382
ZmFLN2	0.163	0.163	0.161	0.166	0.161	0.143	0.15	0.155	0.149	0.158	0.158	0.163	0.137	0.134	0.155	0.155	0.155	0.257	0.264	0.269	0.373	0.382	ID
